# Supplementary material for: Neurocognitive Function and Quality of Life Outcomes in the ONTRAC Study for Skin Cancer Chemoprevention by Nicotinamide
Source: MDPI journal article supplement (doi:10.3390/geriatrics4010031), 2019-03-25

**SUPPLEMENTARY FIGURE S1:** CONSORT diagram for neurocognitive function (NCF) testing of ONTRAC participants

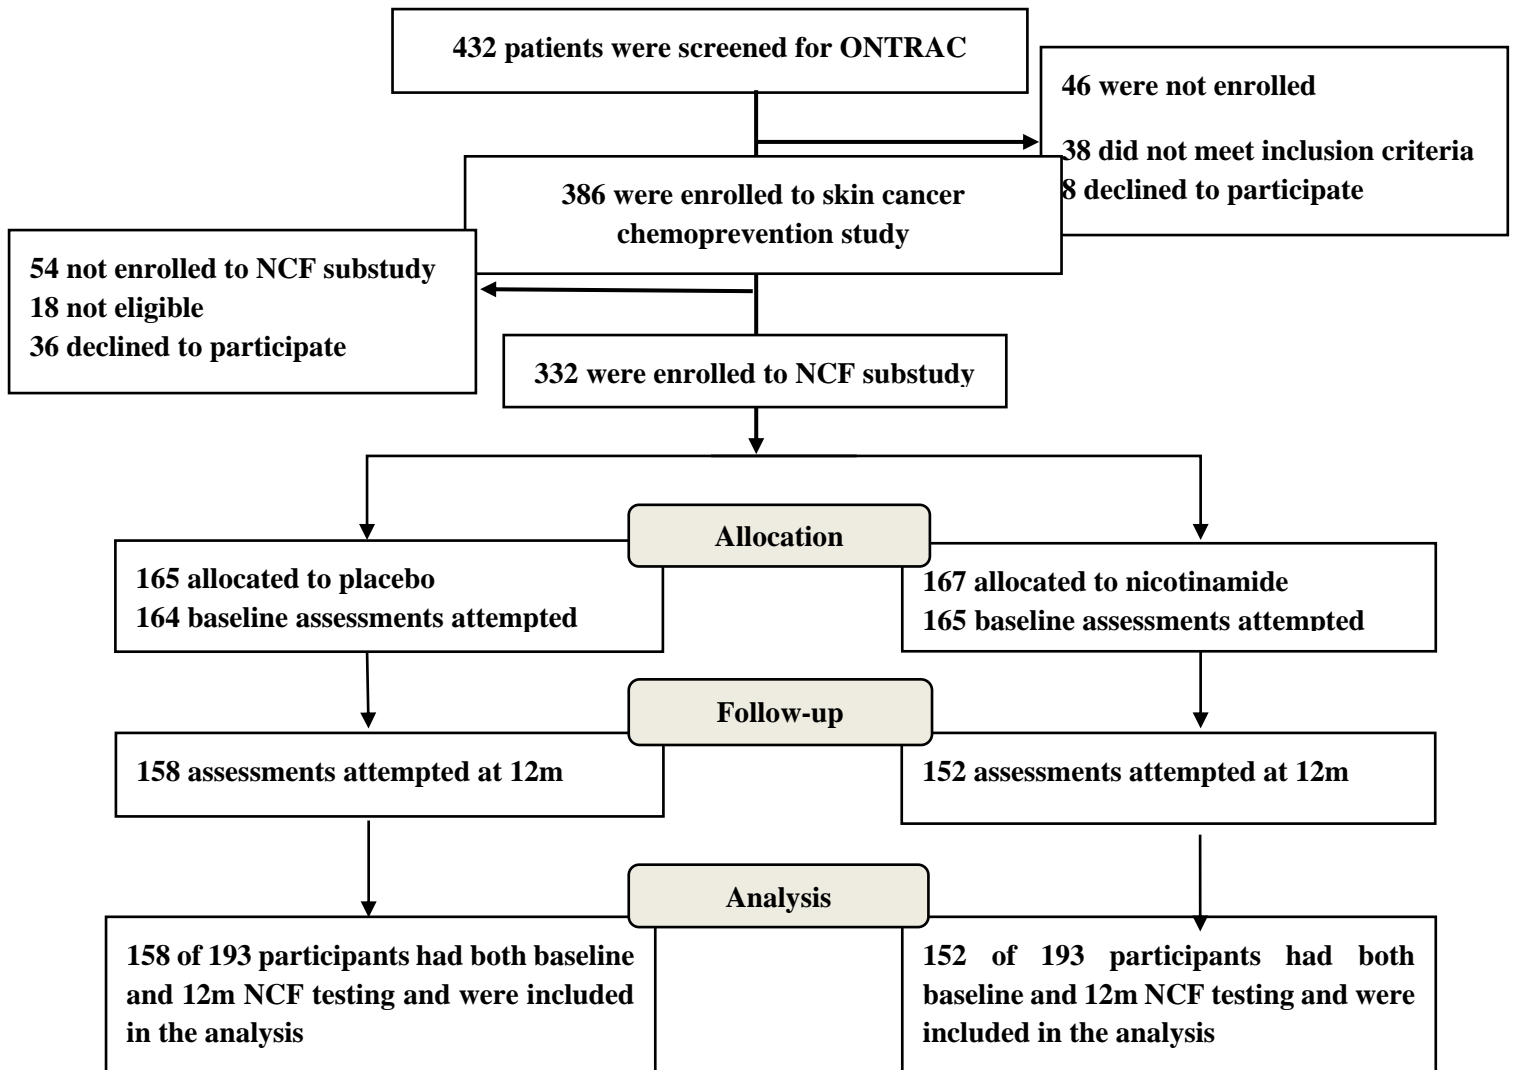

**SUPPLEMENTARY FIGURE S2:** CONSORT diagram for Quality of Life (QoL) assessment of ONTRAC participants

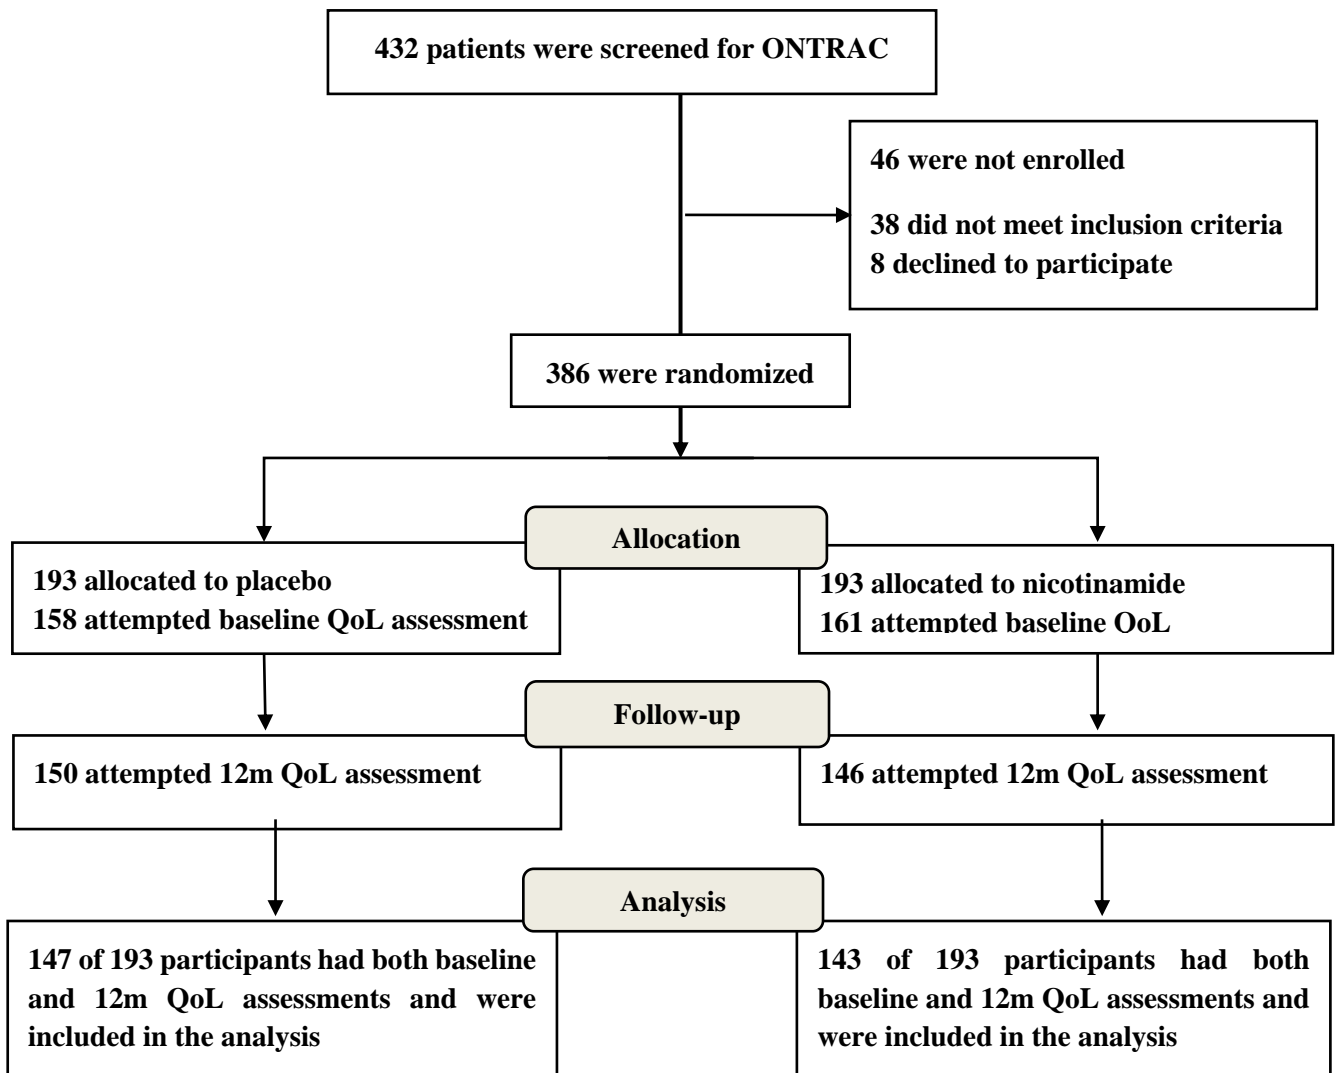

Supplement: s1 [file s1]
